# Supplementary material for: OsMYC2, an essential factor for JA-inductive sakuranetin production in rice, interacts with MYC2-like proteins that enhance its transactivation ability
Source: PubMed Central journal article supplement (PMC5220304; doi:10.1038/srep40175), 2017-01-09
Supplement: srep40175-s1.pdf [file srep40175-s1.pdf]

## **Supplementary information**

### **OsMYC2, an essential factor for JA-inductive sakuranetin production in rice, interacts with MYC2-like proteins that enhance its transactivation ability**

Satoshi Ogawa<sup>1</sup>, Koji Miyamoto<sup>2</sup>, Keiichirou Nemoto<sup>3</sup>, Tatsuya Sawasaki<sup>3</sup>, Hisakazu Yamane<sup>2</sup>, Hideaki Nojiri<sup>1</sup>, and Kazunori Okada<sup>1,\*</sup>

#### Affiliation

<sup>1</sup>Biotechnology Research Center, The University of Tokyo, Bunkyo-ku, Tokyo, Japan

<sup>2</sup>Department of Biosciences, Teikyo University, Utsunomiya, Tochigi, Japan

<sup>3</sup>Proteo-Science Center, Ehime University, Matsuyama, Ehime, Japan

\*Corresponding author: E-mail, [ukazokad@mail.ecc.u-tokyo.ac.jp](mailto:ukazokad@mail.ecc.u-tokyo.ac.jp); Fax: +81-35841-8030

## Supplementary methods

### Plant materials

See *Plant materials* in the main text.

### Cloning

Standard methods for cloning were used for the construction. PCR-amplified DNA fragments were sequenced after cloning into vectors. The vectors referred to in the *supplementary methods* and primers used for the cloning are listed in Supplementary Tables S6 and S7, respectively.

*pGL4-OsNOMT<sub>250</sub>*, *pGL4-OsNOMT<sub>150</sub>*, and *pGL4-OsNOMT<sub>50</sub>*: The 5' 250-, 150-, or 50-bp upstream region of the *OsnOMT* promoter, extending from the transcriptional start site, was PCR-amplified and cloned into the pZErO2 vector (Invitrogen, CA, USA). Each promoter region was extracted and inserted into the multi-cloning sites of pGL4.10-Tnos (see the main text).

*pGL4-OsNOMT<sub>250-26</sub>*: The region -250 to -26 bp from the transcriptional start site of *OsnOMT* was PCR-amplified and inserted into *EcoRV*-digested pGL4.10-Tnos.

### Luciferase activity assay

See *Luciferase activity assay* in the main text.

**Optimized synthetic CDS of *OsMYC2*.**

ATGAACCTCTGGACCGATGATAACGCTTCTATGATGGAAGCTTTTATGGCTTCTGCTGAT  
CTCCCTGCTTTTCCTTGGGGTGCTGCTTCTACCCCTCCTCCACCACCTCCACCTCCACAT  
CATCATCACCAACAGCAGCAACAGCAAGTTCTTCCCTCCTCCTGCTGCTGCACCAGCTGCT  
GCTGCTTTTAATCAGGATACTCTCCAGCAGAGGCTCCAGTCTATTATCGAGGGATCTAGA  
GAGACTTGGACCTACGCTATCTTCTGGCAGTCATCTATCGATGTGTCTACCGGTGCTTCT  
CTTCTCGGATGGGGTGATGGATATTACAAGGGATGTGATGATGATAAGAGGAAGCAGAGG  
TCATCTACCCCTGCTGCAGCTGCTGAACAAGAGCATAGAAAGAGAGTGCTCAGGGAACTC  
AACTCTCTTATCGCTGGTGCTGGTGCTGCTCCTGATGAAGCTGTTGAAGAAGAGGTGACC  
GATACCGAGTGGTTCTTCCCTTGTGTCTATGACCCAGTCTTTCCCTAACGGACTTGGACTT  
CCTGGACAGGCTCTTTTGGCTGCTCAACCTACTTGGATCGCTACCGGACTTTCTTCTGCT  
CCTTGCGATAGAGCTAGACAGGCTTACACTTTCGGACTCAGGACTATGGTTTGCCTTCCCT  
CTCGCTACTGGTGTTCTCGAGCTTGGATCTACCGATGTGATCTTCCAGACCGGTGATTCT  
ATCCCTAGAATCAGGGCTCTCTTCAACCTCAGTGCTGCAGCAGCTTCTTCTTGGCCTCCT  
CATCCAGATGCTGCTTCAGCTGATCCTTCTGTTCTTTGGCTTGCTGATGCTCCTCCTATG  
GATATGAAGGATTCTATCTCTGCTGCTGATATCTCTGTGTCTAAGCCTCCTCCTCCTCCA  
CCTCATCAAATCCAGCATTTCGAGAACGGATCTACCTCTACCCTTACCGAGAACCCTTCT  
CCTTCTGTGCATGCTCCTACACCTTCTCAACCTGCAGCTCCTCCACAAAGACAACAACAA  
CAGCAACAATCTTCTCAGGCTCAGCAGGGACCTTTCAGAAGAGAGCTTAACTTCTCTGAT  
TTCGCTTCTAACGGTGGTGCTGCTGCTCCACCATTTTTCAAGCCTGAGACTGGTGAGATC  
CTCAACTTCGGAAACGATTCTTCATCTGGAAGAAGAAACCCTTACCAGCTCCACCAGCA  
GCTACAGCTTCTCTTACTACTGCTCCTGGATCACTCTTCTCACAGCACACTCCTACTCTT  
ACCGCTGCTGCTAACGATGCTAAGTCTAACAACCAGAAAAGATCTATGGAAGCTACCTCT  
AGGGCTTCTAACACCAACAACCATCCTGCTGCAACCGCTAACGAGGGAATGCTCTCTTTT  
TCATCTGCTCCAACCACCAGGCCTTCTACTGGAAGTGGTGCTCCTGCTAAGTCAGAGTCT  
GATCACTCTGATCTCGAGGCTTCAGTGAGAGAGGTTGAGTCATCTAGAGTTGTGGCACCT  
CCTCCAGAGGCTGAGAAAAGACCTAGAAAAAGAGGTAGGAAGCCTGCTAACGGAAGGGAA  
GAACCTCTCAACCATGTGGAAGCTGAGAGGCAGAGAAGAGAGAAGCTCAACCAGAGATTC  
TACGCTCTCAGAGCTGTGGTGCCTAACGTGTCAAAGATGGATAAGGCTTCACTCCTCGGA  
GATGCTATCTCTTACATCAACGAGCTTAGGGGAAAGCTCACCGCTCTCGAGACTGATAAG  
GAAACCTTGCAGTCTCAGATGGAATCTCTCAAGAAAGAAAGGGATGCTAGGCCTCCTGCT  
CCTTCAGGTGGTGGTGGTGGTGGTGGTGGTGGTGGTGGTGGTGGTGGTGGTGGTGGTGGT  
ATCCTTGGACTCGAGGCTATGATTAGAGTGCAGTGCCACAAGAGAAACCACCCAGCTGCT  
AGACTTATGACCGCTCTTAGAGAACTCGATCTCGATGTGTACCACGCTTCTGTGTCTGTG  
GTGAAGGATCTCATGATCCAGCAAGTGGCTGTGAAGATGGCTTCTAGGGTGTACTCTCAG  
GATCAGTTGAACGCTGCTCTTACACCAGAATCGCTGAACCTGGTACTGCTGCTAGATGA

**CDS of *OsMYL1* described in this article.**

ATGTCGTGGTCCGAGACGGACGCCGCGCTGTTTCGCGGCGGTGCTGGGGCACGACGCGGCG  
CATCACCTGGCCACCACGCCGCCGACCTCGACGCGCCGGAGGGTTCGCCGTTCGTCGGCC  
GAGCTGCAGGCGAGCCTGCACGACCTCGTCGAGCGGCAGGGAGGGGCCTGGACGTACGGC  
ATCTTCTGGCAGGAGTCCC GCGCGCCGGTGCCGCCAGCGGCCGCGCTGCCCGCGCCGTG  
CTCGGCTGGGGCGACGGCCACTGCCGCGACGGTGCCGGACACGGGGAGGTTCGGCGCCGCG  
GAGAGGAGCGTGCGCGGAAGCGCGTGCTGCTGCGGCTGCACGCGCTGTACGGAGGCGGG  
GATGAGGATGGCGCCGACTACGCGCTCCGGCTGGACCGGGTCACCGGCGCCGAGATGTAC  
TTCCTGGCGTCCATGTACTTCTCCTTCCC GAGGGCTCGGGCGGACCGGGCCGCGCTCTG  
GCCTCCGGCCGCCACGCCTGGGCGGACGTAGACCCCCACCTTCCGGCTCCGGTAGCGCG  
CCAGGGTGGTACGTTTCGCTCGTCTCTCGCCCAGTCCGCGGGGTTACGCACCGTTCGTCTTC  
CTCCCGTGCAAGGGCGGCGTTCTCGAGCTCGGTTCCGTTCGTAGCCATCCGCGAGACCCCC  
GAGGTCTTGCGCGCCATCCAATCTGCCATGCGCGCCGTGCCAGCTCCGCGGAAGATTTTC  
ATGAGAATCTTCGGCAAGGATCTCTCACCCGGCCGACCGTCCCAGCCCATGGGATGCGAC  
GCCCCATGGACGCCGCGGCTCGTTGTCCAAACCACGCCGGTGCGCCCAGCCAAGAAGGAG  
GTGGTCAAGGCGAAACCAGCCGAGCCCCCAAGAGCTTGGACTTCTCCAAGGCGAACGTG  
CAGGAACAGGCCGGCGGCCAGGAGCGGCGGCCGCGGAAGCGTGGGCGCAAGCCGGCGAAC  
GGGCGGGAGGAGCCGCTGAACCACGTGGAGGCGGAGCGGCAGCGGGGAGAAGCTGAAC  
CAGAGGTTCTACGCGCTGCGCGCGGTGGTGCCCAAGATCTCCAAGATGGACAAGGCGTCC  
CTGCTCAGCGACGCCATCGCGTACATCCAGGAGCTGGAGGCCCGGCTCAGGGGCGACGCG  
CCCGTGCCCGCGCGGGCGGATGGGCCGGCCGTGGAGGTGAAGGCAATGCAGGACGAGGTG  
GTGCTGCGCGTGACCACGCCCTGGACGAGCACCCCATCTCCAGGGTGTTCACGCCATG  
AGGGAATCCCAGATCAGCGTCGTGGCGTCGGACGTGGCGGTGTCGGACGACGCCGTCACG  
CACACGCTCATGGTGCGGTCGGCCGGGCCGGAGCGGCTCACGGCGGAGACGGTGCTCGCG  
GCGATGTCGCGGGGGGTGAGCGTCACCACTCCCTCCCCGTGA

Underlined region is annotated as intron in RAP-DB, but not in MSU libraries.

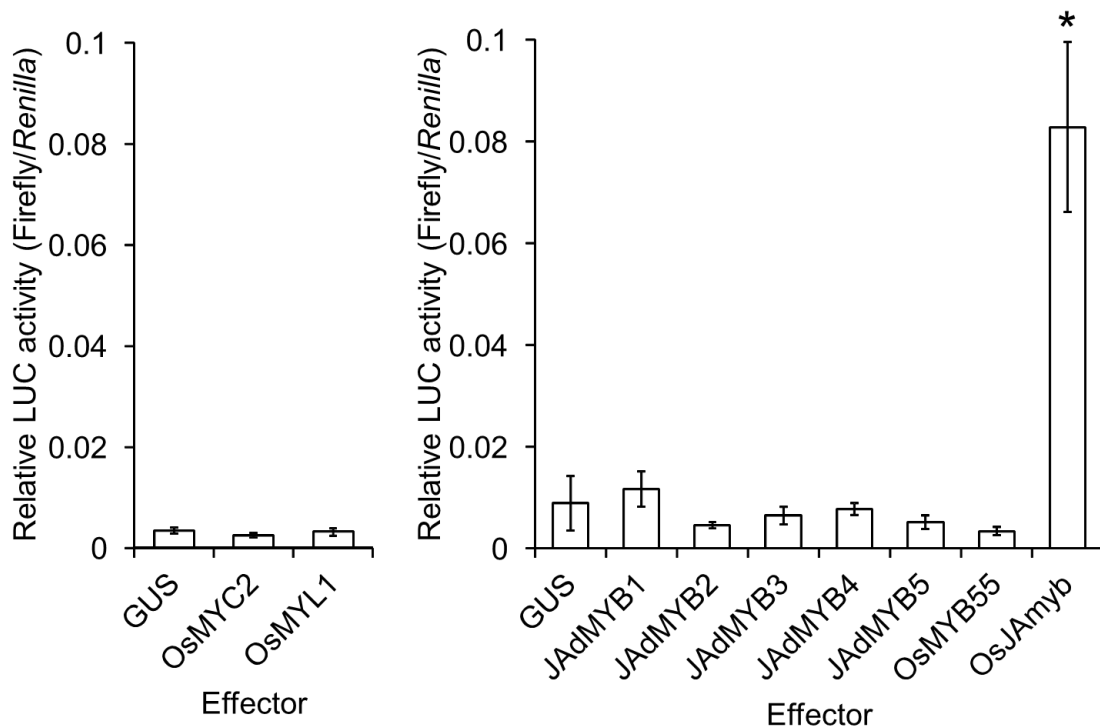

Supplementary Figure S1 ***OsNOMT* promoter-independent effects of JA-induced transcription factors.** Relative luciferase activities in the bombarded rice leaves. Data are presented as FLUC/RLUC  $\pm$  standard error. n = 3–5. \*P < 0.05, compared to the data with GUS as the effector.

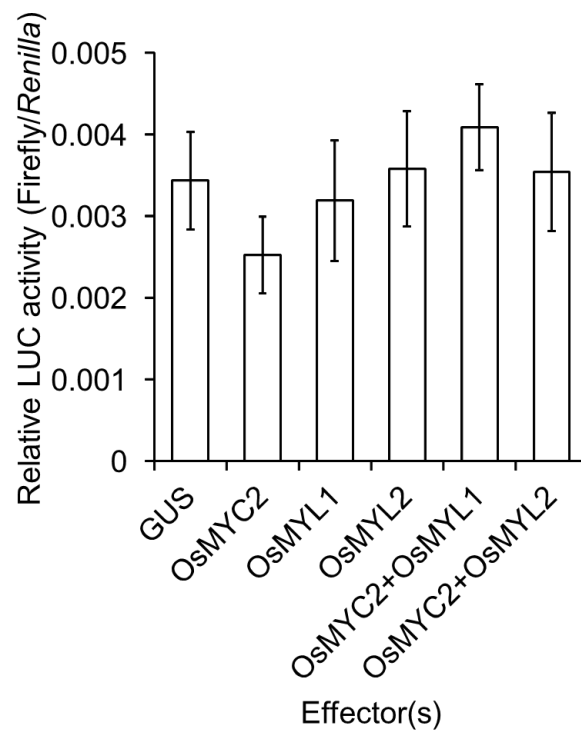

Supplementary Figure S2 *OsNOMT* promoter-independent effects of **OsMYC2**, **OsMYL1**, and **OsMYL2**. Relative luciferase activities in the bombarded rice leaves. Data are presented as FLUC/RLUC  $\pm$  standard error. n = 4.

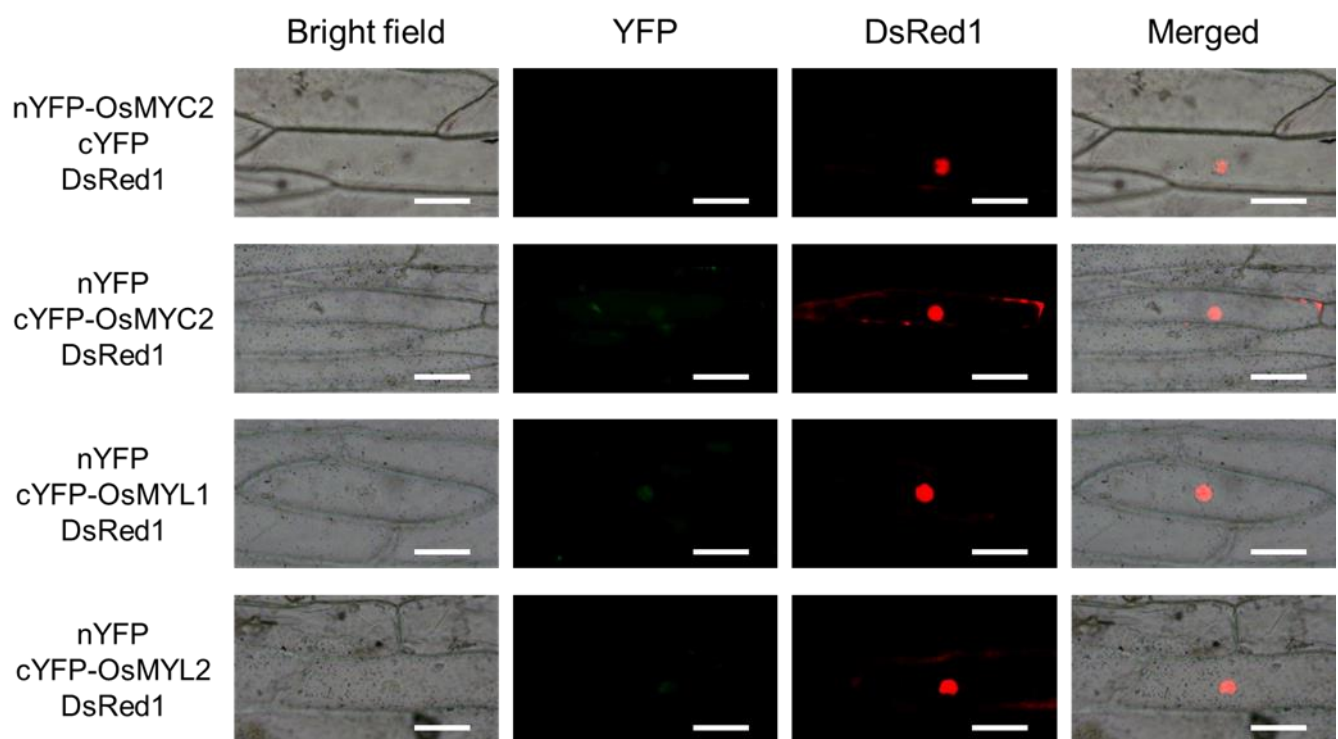

Supplementary Figure S3 **Negative controls of BiFC assays.** Bars = 100  $\mu$ m.

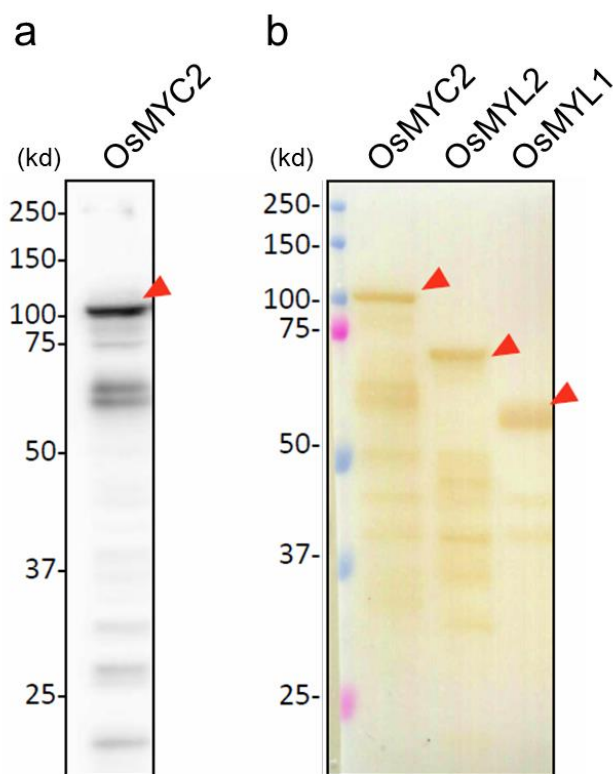

Supplementary Figure S4 **Recombinant proteins expressed using the wheat germ cell-free system.** Two micrograms of the crude protein was applied in each lane. Red arrows indicate the desired proteins. **(a)** Detection of biotinylated-OsMYC2 by using anti-Biotin HRP. **(b)** Detection of FLAG-tagged proteins by using anti-FLAG M2 HRP. A chemiluminescent reagent visualized the recombinant proteins without LAS detection.



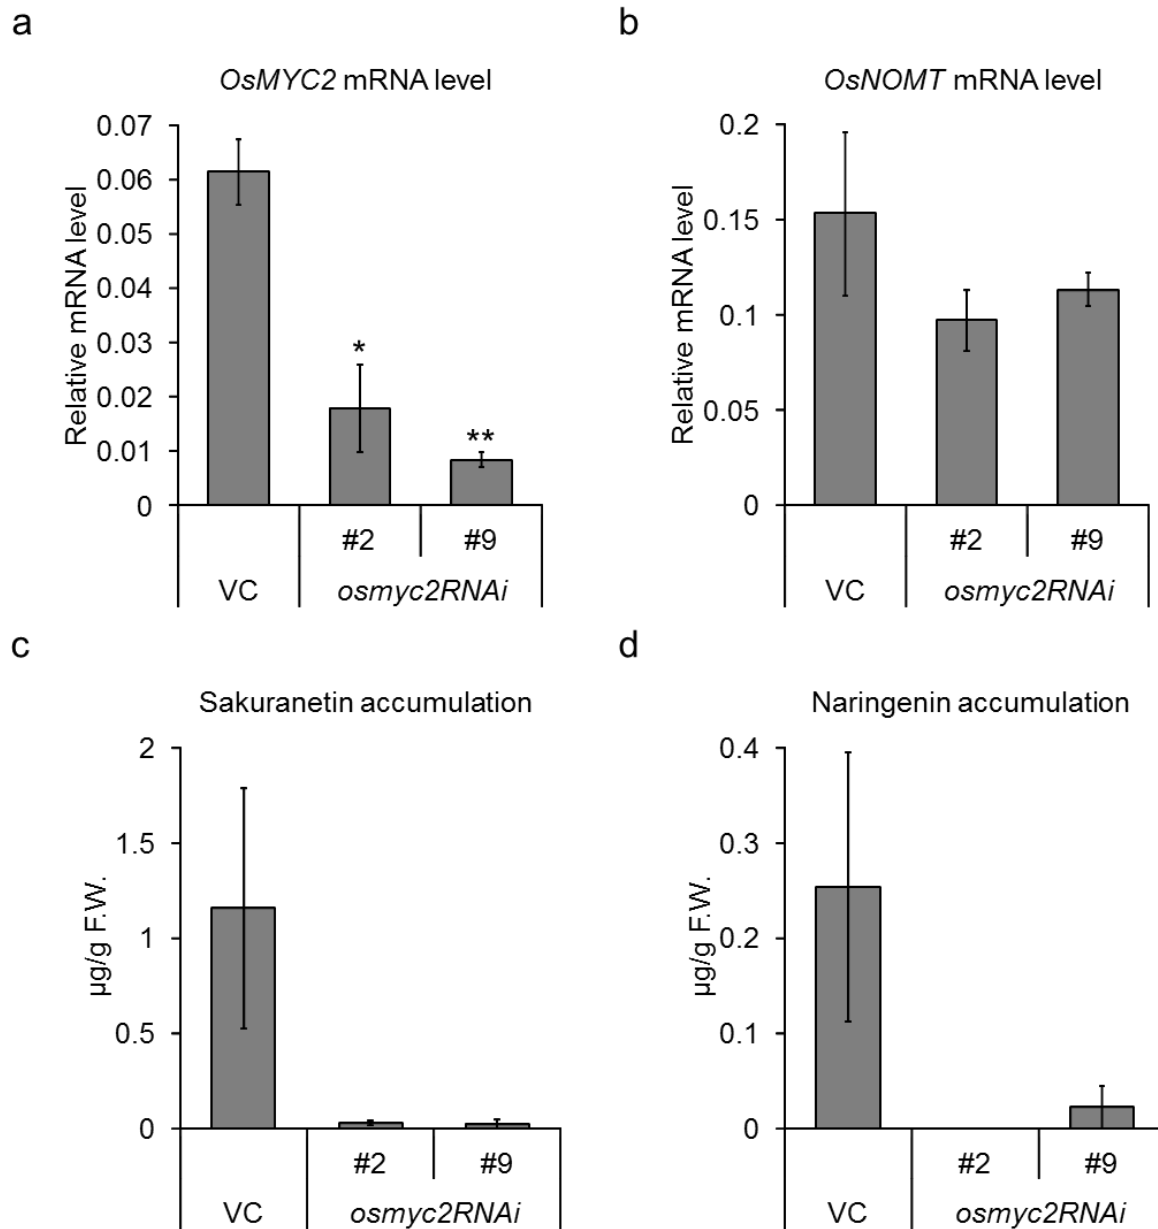

Supplementary Figure S5 **Gene expression and phytoalexin accumulation in the CuCl<sub>2</sub>-treated *OsMYC2*-knockdown plants (*osmyc2RNAi*).** (a, b) Expression levels of *OsMYC2* (a) and *OsNOMT* (b). Total RNA from the rice leaves after 6 h of 500 µM CuCl<sub>2</sub> treatment was extracted. qRT-PCR analysis was performed using the cDNA samples synthesized from the total RNA. (c, d) Contents of sakuranetin (c) and naringenin (d) in the rice leaves. Data are presented as mean ± standard error values. (a, b) n = 3–4, (c, d) n = 4–6. \*P < 0.05, \*\*P < 0.01, compared to the VC data.

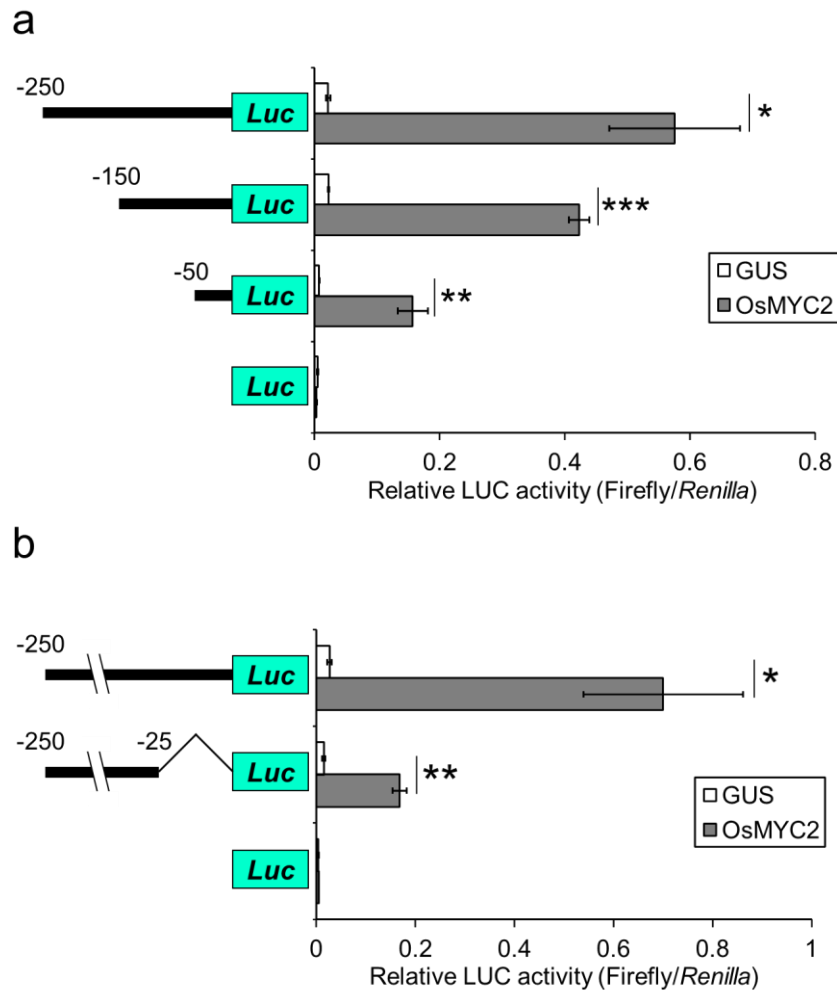

Supplementary Figure S6 **Deletion assay for the *OsNOMT* promoter.** 5'-truncated series (**a**) and 3'-truncated series (**b**) were used for the assay. Data are presented as FLUC/RLUC  $\pm$  standard error. n = 4. \*P < 0.05, \*\*P < 0.01, \*\*\*P < 0.001.

Supplementary Table S1 **CuCl<sub>2</sub>-induced expression of *OsNOMT* in transcriptome analysis.**

| Gene ID      | Gene name | WT CuCl <sub>2</sub> 2 h |         | WT CuCl <sub>2</sub> 6 h |         | WT CuCl <sub>2</sub> 24 h |         |
|--------------|-----------|--------------------------|---------|--------------------------|---------|---------------------------|---------|
|              |           | /WT water 2 h            | Q value | /WT water 6 h            | Q value | /WT water 24 h            | Q value |
| Os12g0240900 | OsNOMT    | 1.115                    | #       | 12.213                   | 0.0038  | 17.002                    | 0.0011  |

# indicates that fold change is  $\leq 2$  and/or that FDR is  $\geq 0.05$ .

Supplementary Table S2 **JA-inducible transcriptional factors selected by transcriptome analysis using *cpm2*.**

| Type     | Gene ID      | Gene name | Description                                                                                                                                                                      | WT                    |         | <i>cpm2</i>            |         | WT                    |         | <i>cpm2</i>           |         |
|----------|--------------|-----------|----------------------------------------------------------------------------------------------------------------------------------------------------------------------------------|-----------------------|---------|------------------------|---------|-----------------------|---------|-----------------------|---------|
|          |              |           |                                                                                                                                                                                  | CuCl <sub>2</sub> 2 h | Q value | CuCl <sub>2</sub> 2 h/ | Q value | CuCl <sub>2</sub> 6 h | Q value | CuCl <sub>2</sub> 6 h | Q value |
|          |              |           |                                                                                                                                                                                  | /WT                   | WT      | /WT                    | WT      | /WT                   | WT      | /WT                   | WT      |
|          |              |           |                                                                                                                                                                                  | water 2 h             | Q value | CuCl <sub>2</sub> 2 h  | Q value | water 6 h             | Q value | CuCl <sub>2</sub> 6 h | Q value |
| HLH/bHLH | Os01g0108600 |           | Basic helix-loop-helix<br>dimerisation region<br>bHLH domain<br>containing protein.<br>[Os01t0108600-01]                                                                         | 2.208                 | 0.0031  | 0.081                  | 0.0085  | 1.401                 | #       | 0.042                 | #       |
|          | Os01g0196300 |           | Helix-loop-helix<br>DNA-binding domain<br>containing protein.<br>[Os01t0196300-01]                                                                                               | 65.337                | 0.0041  | 0.488                  | 0.0204  | 130.220               | #       | 2.781                 | #       |
|          | Os01g0705700 | OsMYL1    | Similar to Transcription<br>factor ICE1 (Inducer of<br>CBF expression 1)<br>(Basic helix- loop-helix<br>protein 116) (bHLH116)<br>(AtbHLH116).<br>[Os01t0705700-01]              | 70.452                | 0.0019  | 0.107                  | 0.0015  | 49.453                | 0.0004  | 0.045                 | 0.0054  |
|          | Os02g0120500 |           | Helix-loop-helix<br>DNA-binding domain<br>containing protein.<br>[Os02t0120500-02]                                                                                               | 2.960                 | 0.0337  | 0.327                  | 0.0440  | 1.902                 | #       | 1.018                 | #       |
|          | Os02g0603600 |           | Similar to<br>Phytochrome-interacting<br>factor 3<br>(Phytochrome-associated<br>protein 3) (Basic<br>helix-loop-helix protein<br>8) (bHLH8)<br>(AtbHLH008).<br>[Os02t0603600-01] | 1.080                 | #       | 0.870                  | #       | 2.380                 | 0.0080  | 0.401                 | 0.0371  |
|          | Os03g0741100 |           | Basic helix-loop-helix<br>dimerisation region<br>bHLH domain                                                                                                                     | 38.999                | 0.0017  | 0.128                  | 0.0183  | 22.264                | #       | 0.229                 | #       |

|              |              |         |                          |         |        |       |        |        |        |       |        |
|--------------|--------------|---------|--------------------------|---------|--------|-------|--------|--------|--------|-------|--------|
|              |              |         | containing protein.      |         |        |       |        |        |        |       |        |
|              |              |         | [Os03t0741100-01]        |         |        |       |        |        |        |       |        |
| Os04g0301500 |              |         | Helix-loop-helix         | 631.858 | 0.0137 | 0.007 | 0.0066 | 58.968 | #      | 0.016 | #      |
|              |              |         | DNA-binding domain       |         |        |       |        |        |        |       |        |
|              |              |         | containing protein.      |         |        |       |        |        |        |       |        |
|              |              |         | [Os04t0301500-01]        |         |        |       |        |        |        |       |        |
| Os05g0163900 |              |         | Helix-loop-helix         | 9.984   | 0.0137 | 0.092 | 0.0126 | 5.653  | 0.0009 | 0.344 | 0.0414 |
|              |              |         | DNA-binding domain       |         |        |       |        |        |        |       |        |
|              |              |         | containing protein.      |         |        |       |        |        |        |       |        |
|              |              |         | [Os05t0163900-01]        |         |        |       |        |        |        |       |        |
| Os07g0628500 |              |         | Basic helix-loop-helix   | 1.398   | #      | 0.483 | #      | 3.197  | 0.0261 | 0.417 | 0.0210 |
|              |              |         | dimerisation region      |         |        |       |        |        |        |       |        |
|              |              |         | bHLH domain              |         |        |       |        |        |        |       |        |
|              |              |         | containing protein.      |         |        |       |        |        |        |       |        |
|              |              |         | [Os07t0628500-01]        |         |        |       |        |        |        |       |        |
| Os09g0501600 |              |         | Similar to MYC1.         | 1.901   | #      | 0.417 | #      | 6.826  | 0.0039 | 0.288 | 0.0035 |
|              |              |         | [Os09t0501600-01]        |         |        |       |        |        |        |       |        |
| Os10g0376900 |              |         | Helix-loop-helix         | 2.558   | #      | 0.243 | #      | 3.365  | 0.0013 | 0.139 | 0.0251 |
|              |              |         | DNA-binding domain       |         |        |       |        |        |        |       |        |
|              |              |         | containing protein.      |         |        |       |        |        |        |       |        |
|              |              |         | [Os10t0376900-01]        |         |        |       |        |        |        |       |        |
| Os10g0575000 | OsMYC2       |         | Similar to Transcription | 3.177   | 0.0083 | 0.177 | 0.0103 | 2.355  | 0.0011 | 0.214 | 0.0179 |
|              |              |         | factor MYC7E             |         |        |       |        |        |        |       |        |
|              |              |         | (Fragment).              |         |        |       |        |        |        |       |        |
|              |              |         | [Os10t0575000-01]        |         |        |       |        |        |        |       |        |
| MYB          | Os01g0192300 | JAdMYB3 | Similar to R1MYB1        | 15.686  | 0.0072 | 0.083 | 0.0396 | 9.418  | 0.0330 | 0.104 | 0.0117 |
|              |              |         | protein.                 |         |        |       |        |        |        |       |        |
|              |              |         | [Os01t0192300-02]        |         |        |       |        |        |        |       |        |
| Os01g0702700 | JAdMYB1      |         | Similar to Transcription | 2.210   | 0.0101 | 0.032 | 0.0065 | 3.497  | 0.0027 | 0.010 | 0.0098 |
|              |              |         | factor MYB86             |         |        |       |        |        |        |       |        |
|              |              |         | (Myb-related protein 86) |         |        |       |        |        |        |       |        |
|              |              |         | (AtMYB86) (Myb           |         |        |       |        |        |        |       |        |
|              |              |         | homolog 4) (AtMyb4).     |         |        |       |        |        |        |       |        |
|              |              |         | [Os01t0702700-01]        |         |        |       |        |        |        |       |        |
| Os02g0641300 |              |         | Rep: ATMYB4-like -       | 1.745   | #      | 0.308 | #      | 2.171  | 0.0063 | 0.319 | 0.0060 |
|              |              |         | Oryza sativa subsp.      |         |        |       |        |        |        |       |        |
|              |              |         | japonica (Rice),         |         |        |       |        |        |        |       |        |
|              |              |         | complete [TC417408]      |         |        |       |        |        |        |       |        |

|       |              |         |                                                                                                                                     |         |        |       |        |        |        |       |        |
|-------|--------------|---------|-------------------------------------------------------------------------------------------------------------------------------------|---------|--------|-------|--------|--------|--------|-------|--------|
|       | Os05g0429900 | JAdMYB4 | Similar to MybHv5<br>(Fragment).<br>[Os05t0429900-01]                                                                               | 10.548  | 0.0041 | 0.343 | 0.0016 | 11.496 | 0.0098 | 0.134 | 0.0009 |
|       | Os05g0442400 |         | Similar to MybSt1.<br>[Os05t0442400-01]                                                                                             | 132.454 | 0.0128 | 0.014 | 0.0033 | 49.550 | 0.0306 | 0.046 | 0.0034 |
|       | Os05g0553400 | OsMYB55 | Similar to Myb-related<br>transcription factor-like<br>protein (MYB<br>transcription factor).<br>[Os05t0553400-01]                  | 7.073   | 0.0025 | 0.409 | 0.0247 | 10.666 | 0.0025 | 0.194 | 0.0027 |
|       | Os08g0549000 | JAdMYB5 | Similar to MybHv5<br>(Fragment).<br>[Os08t0549000-00]                                                                               | 4.410   | 0.0060 | 0.419 | 0.0123 | 5.257  | 0.0035 | 0.329 | 0.0191 |
|       | Os11g0684000 | OsJAmyb | Similar to Transcription<br>factor MYB21<br>(Myb-related protein 21)<br>(AtMYB21) (Myb<br>homolog 3) (AtMyb3).<br>[Os11t0684000-01] | 20.002  | 0.0008 | 0.126 | 0.0063 | 24.901 | 0.0004 | 0.070 | 0.0034 |
|       | Os12g0564100 | JAdMYB2 | Similar to<br>R2R3MYB-domain<br>protein (Fragment).<br>[Os12t0564100-01]                                                            | 4.645   | 0.0048 | 0.019 | 0.0037 | 2.439  | 0.0280 | 0.022 | 0.0203 |
| ----- |              |         |                                                                                                                                     |         |        |       |        |        |        |       |        |
| bZIP  | Os06g0662200 |         | bZIP transcription<br>factor, bZIP-1 domain<br>containing protein.<br>[Os06t0662200-01]                                             | 0.647   | #      | 1.451 | #      | 3.875  | 0.0070 | 0.079 | 0.0175 |
|       | Os08g0357300 |         | Similar to BZIP<br>DNA-binding protein.<br>[Os08t0357300-01]                                                                        | 0.605   | #      | 0.597 | #      | 4.375  | 0.0007 | 0.195 | 0.0207 |
|       | Os12g0560900 |         | Similar to BZIP protein.<br>[Os12t0560900-01]                                                                                       | 1.889   | #      | 0.561 | #      | 3.170  | 0.0027 | 0.443 | 0.0088 |
| ----- |              |         |                                                                                                                                     |         |        |       |        |        |        |       |        |
| WRKY  | Os01g0185900 |         | Similar to WRKY 1<br>(Fragment).<br>[Os01t0185900-01]                                                                               | 9.353   | 0.0009 | 0.413 | 0.0064 | 12.934 | 0.0008 | 0.466 | 0.0149 |
|       | Os01g0186000 |         | Similar to WRKY<br>transcription factor 10.<br>[Os01t0186000-01]                                                                    | 24.393  | 0.0022 | 0.050 | 0.0159 | 26.186 | 0.0012 | 0.065 | 0.0057 |

|              |                                                                                                         |          |        |       |        |          |        |       |        |
|--------------|---------------------------------------------------------------------------------------------------------|----------|--------|-------|--------|----------|--------|-------|--------|
| Os01g0626400 | DNA-binding protein<br>WRKY2-like (WRKY<br>transcription factor 11)<br>(WRKY16).<br>[Os01t0626400-01]   | 5.141    | 0.0009 | 0.185 | 0.0092 | 9.051    | 0.0014 | 0.154 | 0.0027 |
| Os01g0714800 | WRKY transcription<br>factor 26.<br>[Os01t0714800-01]                                                   | 1478.633 | 0.0009 | 0.049 | 0.0075 | 1800.347 | 0.0003 | 0.363 | 0.0091 |
| Os01g0734000 | Similar to WRKY DNA<br>binding protein.<br>[Os01t0734000-01]                                            | 4.291    | 0.0013 | 0.225 | 0.0108 | 3.804    | 0.0073 | 0.124 | 0.0066 |
| Os01g0750100 | Similar to WRKY13<br>transcription factor.<br>[Os01t0750100-03]                                         | 1.366    | #      | 0.534 | #      | 2.201    | 0.0033 | 0.320 | 0.0100 |
| Os01g0821600 | WRKY transcription<br>factor 48-like protein<br>(WRKY transcription<br>factor 21).<br>[Os01t0821600-01] | 58.586   | 0.0003 | 0.485 | 0.0072 | 35.706   | #      | 0.679 | #      |
| Os02g0770500 | Similar to WRKY<br>transcription factor 32.<br>[Os02t0770500-00]                                        | 9.112    | 0.0009 | 0.196 | 0.0227 | 8.687    | 0.0020 | 0.149 | 0.0054 |
| Os05g0583000 | WRKY transcription<br>factor 34.<br>[Os05t0583000-01]                                                   | 1.790    | #      | 0.194 | #      | 2.318    | 0.0033 | 0.136 | 0.0058 |
| Os11g0117500 | DNA-binding WRKY<br>domain containing<br>protein.<br>[Os11t0117500-01]                                  | 398.079  | 0.0115 | 0.026 | 0.0015 | 731.906  | 0.0077 | 0.076 | 0.0109 |
| Os11g0490900 | Similar to WRKY<br>transcription factor 72.<br>[Os11t0490900-01]                                        | 29.821   | 0.0011 | 0.321 | 0.0035 | 39.339   | #      | 0.967 | #      |
| Os12g0116700 | Similar to WRKY<br>transcription factor 64.<br>[Os12t0116700-01]                                        | 345.859  | 0.0072 | 0.022 | 0.0021 | 582.052  | 0.0041 | 0.063 | 0.0041 |
| NAC          | Os01g0816100<br>Similar to NAC domain<br>protein.<br>[Os01t0816100-01]                                  | 140.804  | 0.0010 | 0.140 | 0.0047 | 199.857  | 0.0003 | 0.476 | 0.0231 |

|              |                                                                                                                                |        |                                                        |       |        |        |        |       |        |       |   |
|--------------|--------------------------------------------------------------------------------------------------------------------------------|--------|--------------------------------------------------------|-------|--------|--------|--------|-------|--------|-------|---|
| Os03g0777000 | Similar to NAC-domain<br>containing protein 19<br>(ANAC019) (ANAC)<br>(Abscisic-acid-<br>responsive NAC).<br>[Os03t0777000-01] | 10.184 | 0.0007                                                 | 0.165 | 0.0068 | 14.617 | #      | 0.910 | #      |       |   |
| Os03g0815100 | Similar to OsNAC6<br>protein.<br>[Os03t0815100-01]                                                                             | 8.674  | 0.0012                                                 | 0.489 | 0.0412 | 9.519  | #      | 0.583 | #      |       |   |
| Os08g0200600 | Similar to NAC-domain<br>containing protein 21/22<br>(ANAC021)<br>(ANAC022). Splice<br>isoform 2.<br>[Os08t0200600-01]         | 1.512  | #                                                      | 0.830 | #      | 5.387  | 0.0003 | 0.125 | 0.0045 |       |   |
| Os11g0126900 | Similar to NAC domain<br>transcription factor.<br>[Os11t0126900-01]                                                            | 2.607  | 0.0180                                                 | 0.310 | 0.0066 | 1.163  | #      | 0.219 | #      |       |   |
| (OsMYL2)     | Os01g0235700                                                                                                                   | OsMYL2 | Similar to BHLH<br>transcription factor<br>(Fragment). | 1.027 | #      | 1.004  | #      | 1.156 | #      | 0.971 | # |

# indicates that fold change is not sufficient for selection and/or that FDR is  $\geq 0.05$ .



## Supplementary Table S3 Vectors used in this study.

| Vector                        | Relevant characteristics                                                                                                                                                   | Reference  |
|-------------------------------|----------------------------------------------------------------------------------------------------------------------------------------------------------------------------|------------|
| pENTR/D-TOPO                  | Km <sup>R</sup> , Gateway system entry vector                                                                                                                              | Invitrogen |
| pENTR-RLUC                    | Km <sup>R</sup> , pENTR/D-TOPO containing <i>renilla luciferase</i> CDS                                                                                                    | This study |
| pRL                           | Amp <sup>R</sup> , CaMV 35S promoter-Renilla <i>LUC</i>                                                                                                                    | Promega    |
| pUbi-RfA-Tnos                 | Amp <sup>R</sup> , Cm <sup>R</sup> , <i>ccdB</i> , pUCAP/Ubi-NT containing gateway cassette (RfA, invitrogen) cloned into <i>Bam</i> HI/ <i>Sac</i> I sites after blunting | 15         |
| pUbi-RLUC                     | Amp <sup>R</sup> , pUbi-RfA-Tnos containing <i>renilla luciferase</i> CDS                                                                                                  | This study |
| pZErO2                        | Km <sup>R</sup> , <i>ccdB</i> , cloning vector                                                                                                                             | Invitrogen |
| pZErO2-OsNOMT <sub>1000</sub> | Km <sup>R</sup> pZErO2 containing 5' 1-kb upstream region of <i>OsNOMT</i>                                                                                                 | This study |
| pGL4-Tnos                     | Amp <sup>R</sup> , Firefly <i>LUC-NOS</i> terminator                                                                                                                       | This study |
| pGL4-OsNOMT <sub>1000</sub>   | Amp <sup>R</sup> , 5' 1-kb upstream region of <i>OsNOMT</i> - Firefly <i>LUC-NOS</i> terminator                                                                            | This study |
| pENTR-OsMYC2                  | Km <sup>R</sup> , pENTR/D-TOPO containing <i>OsMYC2</i> CDS                                                                                                                | This study |
| pENTR-OsMYL1                  | Km <sup>R</sup> , pENTR/D-TOPO containing <i>OsMYL1</i> CDS                                                                                                                | This study |
| pENTR-OsMYL2                  | Km <sup>R</sup> , pENTR/D-TOPO containing <i>OsMYL2</i> CDS                                                                                                                | This study |
| pENTR-JAdMYB1                 | Km <sup>R</sup> , pENTR/D-TOPO containing <i>JA-dependent (JAd) MYB1</i> CDS                                                                                               | This study |
| pENTR-JAdMYB2                 | Km <sup>R</sup> , pENTR/D-TOPO containing <i>JAdMYB2</i> CDS                                                                                                               | This study |
| pENTR-JAdMYB3                 | Km <sup>R</sup> , pENTR/D-TOPO containing <i>JAdMYB3</i> CDS                                                                                                               | This study |
| pENTR-JAdMYB4                 | Km <sup>R</sup> , pENTR/D-TOPO containing <i>JAdMYB4</i> CDS                                                                                                               | This study |
| pENTR-JAdMYB5                 | Km <sup>R</sup> , pENTR/D-TOPO containing <i>JAdMYB5</i> CDS                                                                                                               | This study |
| pENTR-OsJAmyb                 | Km <sup>R</sup> , pENTR/D-TOPO containing <i>OsJAmyb</i> CDS                                                                                                               | This study |
| pENTR-OsMYB55                 | Km <sup>R</sup> , pENTR/D-TOPO containing <i>OsMYB55</i> CDS                                                                                                               | This study |
| pUbi-GUS                      | Amp <sup>R</sup> , pUbi_RfA containing 1.8 kb <i>GUS</i> fragment from pENTR-GUS                                                                                           | 15         |
| pUbi-OsMYC2                   | Amp <sup>R</sup> , pUbi-RfA-Tnos containing <i>OsMYC2</i> CDS                                                                                                              | This study |
| pUbi-OsMYL1                   | Amp <sup>R</sup> , pUbi-RfA-Tnos containing <i>OsMYL1</i> CDS                                                                                                              | This study |
| pUbi-OsMYL2                   | Amp <sup>R</sup> , pUbi-RfA-Tnos containing <i>OsMYL2</i> CDS                                                                                                              | This study |
| pUbi-JAdMYB1                  | Amp <sup>R</sup> , pUbi-RfA-Tnos containing <i>JAdMYB1</i> CDS                                                                                                             | This study |
| pUbi-JAdMYB2                  | Amp <sup>R</sup> , pUbi-RfA-Tnos containing <i>JAdMYB2</i> CDS                                                                                                             | This study |
| pUbi-JAdMYB3                  | Amp <sup>R</sup> , pUbi-RfA-Tnos containing <i>JAdMYB3</i> CDS                                                                                                             | This study |
| pUbi-JAdMYB4                  | Amp <sup>R</sup> , pUbi-RfA-Tnos containing <i>JAdMYB4</i> CDS                                                                                                             | This study |
| pUbi-JAdMYB5                  | Amp <sup>R</sup> , pUbi-RfA-Tnos containing <i>JAdMYB5</i> CDS                                                                                                             | This study |
| pUbi-OsJAmyb                  | Amp <sup>R</sup> , pUbi-RfA-Tnos containing <i>OsJAmyb</i> CDS                                                                                                             | This study |
| pUbi-OsMYB55                  | Amp <sup>R</sup> , pUbi-RfA-Tnos containing <i>OsMYB55</i> CDS                                                                                                             | This study |
| pENTR-OsMYC2 RNAi             | Km <sup>R</sup> , pENTR/D-TOPO containing 748-bp trigger region of <i>OsMYC2</i>                                                                                           | This study |
| pANDA                         | Hm <sup>R</sup> , Km <sup>R</sup> , Cm <sup>R</sup> , <i>ccdB</i> , maize <i>ubiquitin</i> promoter-Gateway (reverse)- <i>gus</i> linker-Gateway- <i>NOS</i> terminator,   | 32         |
| pANDA-OsMYC2                  | Hm <sup>R</sup> , Km <sup>R</sup> , pANDA containing 748-bp trigger region of <i>OsMYC2</i>                                                                                | This study |

|                          |                                                                                                                                 |            |
|--------------------------|---------------------------------------------------------------------------------------------------------------------------------|------------|
| pnYGW                    | Amp <sup>R</sup> , Cm <sup>R</sup> , <i>ccdB</i> , CaMV 35S promoter- nEYFP-Gateway- <i>NOS</i> terminator                      | 34         |
| pcYGW                    | Amp <sup>R</sup> , Cm <sup>R</sup> , <i>ccdB</i> , CaMV 35S promoter- cEYFP-Gateway- <i>NOS</i> terminator                      | 34         |
| pnYOsMYC2                | Amp <sup>R</sup> , pnYGW containing <i>OsMYC2</i> CDS                                                                           | This study |
| pcYOsMYC2                | Amp <sup>R</sup> , pcYGW containing <i>OsMYC2</i> CDS                                                                           | This study |
| pcYOsMYL1                | Amp <sup>R</sup> , pcYGW containing <i>OsMYL1</i> CDS                                                                           | This study |
| pcYOsMYL2                | Amp <sup>R</sup> , pcYGW containing <i>OsMYL2</i> CDS                                                                           | This study |
| pTH121R                  | Amp <sup>R</sup> , CaMV 35S promoter- <i>DsRed1</i> - <i>NOS</i> terminator                                                     | 17         |
| pENTR-optOsMYC2          | Km <sup>R</sup> , pENTR/D-TOPO containing optimized <i>OsMYC2</i> CDS                                                           | This study |
| pEU-E01-6His-Bls-GW-STOP | Amp <sup>R</sup> , Cm <sup>R</sup> , <i>ccdB</i> , SP6 promoter-E01 translational enhancer-His tag-biotin ligation site-Gateway | This study |
| pEU-E01-FLAG-GW-STOP     | Amp <sup>R</sup> , Cm <sup>R</sup> , <i>ccdB</i> , SP6 promoter-E01 translational enhancer-FLAG tag-Gateway                     | 35         |
| pEU-HisBls-optOsMYC2     | Amp <sup>R</sup> , pEU-E01-6His-Bls-GW containing optimized <i>OsMYC2</i> CDS                                                   | This study |
| pEU-FLAG-optOsMYC2       | Amp <sup>R</sup> , pEU-E01-FLAG-GW containing optimized <i>OsMYC2</i> CDS                                                       | This study |
| pEU-FLAG-OsMYL1          | Amp <sup>R</sup> , pEU-E01-FLAG-GW containing <i>OsMYL1</i> CDS                                                                 | This study |
| pEU-FLAG-OsMYL2          | Amp <sup>R</sup> , pEU-E01-FLAG-GW containing <i>OsMYL2</i> CDS                                                                 | This study |
| 430T1.2                  | Amp <sup>R</sup> , CaMV 35S promoter-GAL4 DNA binding domain- <i>NOS</i> terminator                                             | 36         |
| p35S-GAL-OsMYC2          | Amp <sup>R</sup> , 430T1.2 containing <i>OsMYC2</i> CDS                                                                         | This study |
| p35S-GAL-OsMYL1          | Amp <sup>R</sup> , 430T1.2 containing <i>OsMYL1</i> CDS                                                                         | This study |
| p35S-GAL-OsMYL2          | Amp <sup>R</sup> , 430T1.2 containing <i>OsMYL2</i> CDS                                                                         | This study |
| GAL4-TATA-LUC-NOS        | Amp <sup>R</sup> , GAL4 <i>cis</i> -firefly <i>LUC</i> - <i>NOS</i> terminator                                                  | 28         |

## Supplementary Table S4 Primers used for cloning.

| Primer                    | Sequence                                                             |
|---------------------------|----------------------------------------------------------------------|
| RLUC Fw                   | 5'-CACCATGACTTCGAAAAGTTTATGATCCA-3'                                  |
| RLUC Rv                   | 5'-TTATTGTTCATTTTGAGAACTCGCT-3'                                      |
| OsNOMT <sub>1000</sub> Fw | 5'-AAAGGTACCATAAATCTCCCATATATGTAGACAGTTTC-3'                         |
| OsNOMT <sub>1000</sub> Rv | 5'-GGGGAGCTCGCTACTATACGGGGACACTG-3'                                  |
| OsMYC2 Fw                 | 5'-CACCATGAACCTTTGGACGGACGACAACGCGTC-3'                              |
| OsMYC2 Rv                 | 5'-TTACCGGGCGGCGGTGCC-3'                                             |
| OsMYL1 Fw                 | 5'-CACCATGTCGTGGTCCGAGACG -3'                                        |
| OsMYL1 Rv                 | 5'-TCACGGGGAGGGAGTGGTG -3'                                           |
| OsMYL2 Fw                 | 5'-CACCATGGTGATGAAGATGGAGGC -3'                                      |
| OsMYL2 Rv                 | 5'-CTACCCTGAGTTCATCACGC -3'                                          |
| JAdMYB1 Fw                | 5'-CACCATGGGACGGCACGCGTGCTC -3'                                      |
| JAdMYB1 Rv                | 5'-TCATCGGAAGTACTCGAAGTTGAAGTCGCCGAC -3'                             |
| JAdMYB2 Fw                | 5'-CACCATGGCAGCATCGCAGAGGAG -3'                                      |
| JAdMYB2 Rv                | 5'-TCATCGATTCCATATATAATTCGAATCAAATCGACATCG -3'                       |
| JAdMYB3 Fw                | 5'-CACCATGGCCAGGAAATGCTCCAGCTG -3'                                   |
| JAdMYB3 Rv                | 5'-TCAAGTGACCCTGATTGTCCCCAAAAAAGG -3'                                |
| JAdMYB4 Fw                | 5'-CACCATGGGGAGGTGCGCCGTGCTG -3'                                     |
| JAdMYB4 Rv                | 5'-TCATATGTACTGGCCTTGTTC AACGGCCTG -3'                               |
| JAdMYB5 Fw                | 5'-CACCATGGGGAGGTGCGCCGTGCTG -3'                                     |
| JAdMYB5 Rv                | 5'-TCATTTTCATGGGGAGGCTTCTGAAGTCGAGC -3'                              |
| OsJAmyb Fw                | 5'-CACCATGGAGATGGTGCTGCAGAGGAC -3'                                   |
| OsJAmyb Rv                | 5'-TTATTGCATCTTCCATATGTCCTAGACTCCATAGAG -3'                          |
| OsMYB55 Fw                | 5'-CACCATGGGGCGCGCCGTGCTG -3'                                        |
| OsMYB55 Rv                | 5'-CTATGTCAGGGTGTTCAGAGACCCTGTGGCTTGG -3'                            |
| OsMYC2 RNAi Fw            | 5'-CACCCCTCTACATCAACGAGCTCC-3'                                       |
| OsMYC2 RNAi Rv            | 5'-ACAAGGACCAACATATCGCC-3'                                           |
| pEU-bls-InFusion Fw       | 5'-AACGACATCTTCGAGGCCAGAAAGATCGAGTGGCACGAAACAAGTTTGTACAAAAAAGC-3'    |
| pEU-bls-InFusion Rv       | 5'-CTCGAAGATGTCGTTCAAGCCATGATGGTGATGGTGATGCATGATATCTTGGTGATGTAG-3'   |
| optOsMYC2 Fw 1-           | 5'-CACCATGAACCTCTGGACCGATGATAACG-3'                                  |
| optOsMYC2 Fw 671-         | 5'-GTGTTCTCGAGCTTGGATCTACCGATGTGATCTTCCAGAC-3'                       |
| optOsMYC2 Rv              | 5'-TCATCTAGCAGCAGTACCAGGTTC-3'                                       |
| OsMYC2 GAL4 Fw            | 5'-GGAGGCCGAATTC <del>CCCGGG</del> GATGAACCTTTGGACGGACGACAACGCGTC-3' |
| OsMYC2 GAL4 Rv            | 5'-GGTCGACGGAT <del>CCCGGG</del> TACCGGGCGGCGGTGCC-3'                |
| OsMYL1 GAL4 Fw            | 5'-GGAGGCCGAATTC <del>CCCGGG</del> GATGTCGTGGTCCGAGACGGACG-3'        |
| OsMYL1 GAL4 Rv            | 5'-GGTCGACGGAT <del>CCCGGG</del> TACCGGGAGGGAGTGGTGAC-3'             |

OsMYL2 GAL4 Fw 5'-GGAGGCCGAATTCCCCGGGGATGGTGATGAAGATGGAGGCTGATG-3'

OsMYL2 GAL4 Rv 5'-GGTCGACGGATCCCCGGGCTACCCTGAGTTCATCACGCGAG-3'

Restriction sites are underlined. Bls-tag epitope sequence is shaded. His tag sequence is shown in bold.

Supplementary Table S5 **Primers used for expression analyses.**

| <b>Primer</b> | <b>Sequence</b>                | <b>Target gene</b> |
|---------------|--------------------------------|--------------------|
| OsUBQ RT Fw   | 5'-TCCGAGAGATGGGTTTCATC -3'    | <i>OsUBQ</i>       |
| OsUBQ RT Fw   | 5'-GCCAAGATTGCCAAGAAGAC-3'     | <i>OsUBQ</i>       |
| OsMYC2 Fw     | 5'-AGCTCAACCAGCGCTTCTAC-3'     | <i>OsMYC2</i>      |
| OsMYC2 Rv     | 5'-GTCTCCTTGTCGGTCTCCAG-3'     | <i>OsMYC2</i>      |
| OsNOMT Fw     | 5'-AAGGTGTTTCATGGAGAAGTGGTA-3' | <i>OsNOMT</i>      |
| OsNOMT Rv     | 5'-CTGGTTGAAGAGCGTGTGGA-3'     | <i>OsNOMT</i>      |

Supplementary Table S6 **Vectors referred to in the *Supplementary methods* section.**

| Vector                          | Relevant characteristics                                                                             | Reference  |
|---------------------------------|------------------------------------------------------------------------------------------------------|------------|
| pUbi-RLUC                       | Amp <sup>R</sup> , pUbi-RfA-Tnos containing <i>renilla luciferase</i> CDS                            | This study |
| pZErO2                          | Km <sup>R</sup> , <i>ccdB</i> , cloning vector                                                       | Invitrogen |
| pZErO2-OsNOMT <sub>250</sub>    | Km <sup>R</sup> pZErO2 containing 5' 250-bp upstream region of <i>OsNOMT</i>                         | This study |
| pZErO2-OsNOMT <sub>150</sub>    | Km <sup>R</sup> pZErO2 containing 5' 150-bp upstream region of <i>OsNOMT</i>                         | This study |
| pZErO2-OsNOMT <sub>50</sub>     | Km <sup>R</sup> pZErO2 containing 5' 50-bp upstream region of <i>OsNOMT</i>                          | This study |
| pZErO2-OsNOMT <sub>250-26</sub> | Km <sup>R</sup> pZErO2 containing 5' 250–26-bp upstream region of <i>OsNOMT</i>                      | This study |
| pGL4-Tnos                       | Amp <sup>R</sup> , Firefly <i>LUC-NOS</i> terminator                                                 | This study |
| pGL4-OsNOMT <sub>250</sub>      | Amp <sup>R</sup> , 5' 250-bp upstream region of <i>OsNOMT</i> - Firefly <i>LUC-NOS</i> terminator    | This study |
| pGL4-OsNOMT <sub>150</sub>      | Amp <sup>R</sup> , 5' 150-bp upstream region of <i>OsNOMT</i> - Firefly <i>LUC-NOS</i> terminator    | This study |
| pGL4-OsNOMT <sub>50</sub>       | Amp <sup>R</sup> , 5' 50-bp upstream region of <i>OsNOMT</i> - Firefly <i>LUC-NOS</i> terminator     | This study |
| pGL4-OsNOMT <sub>250-26</sub>   | Amp <sup>R</sup> , 5' 250–26-bp upstream region of <i>OsNOMT</i> - Firefly <i>LUC-NOS</i> terminator | This study |
| pUbi-GUS                        | Amp <sup>R</sup> , pUbi_RfA containing 1.8 kb <i>GUS</i> fragment from pENTR-GUS                     | 15         |
| pUbi-OsMYC2                     | Amp <sup>R</sup> , pUbi-RfA-Tnos containing <i>OsMYC2</i> CDS                                        | This study |

Supplementary Table S7 **Primers used for cloning and referred to in the *Supplementary methods* section.**

| Primer                      | Sequence                                                  |
|-----------------------------|-----------------------------------------------------------|
| OsNOMT <sub>250</sub> Fw    | 5'-AAACTC <u>GAG</u> TAGGAAGTTTAATGGACTTTTAGTAGATAATAG-3' |
| OsNOMT <sub>250</sub> Rv    | 5'-GGGAGATC <u>TGCT</u> ACTATACGGGGACAC-3'                |
| OsNOMT <sub>150</sub> Fw    | 5'-AAACTC <u>GAG</u> AACGTTGGAAAAAACCAACTACAC-3'          |
| OsNOMT <sub>150</sub> Rv    | 5'-GGGAGATC <u>TGCT</u> ACTATACGGGGACAC-3'                |
| OsNOMT <sub>50</sub> Fw     | 5'-AAACTC <u>GAG</u> AGCTAGGTATCCTAGCTATATAAAC-3'         |
| OsNOMT <sub>50</sub> Rv     | 5'-GGGAGATC <u>TGCT</u> ACTATACGGGGACAC-3'                |
| OsNOMT <sub>250-26</sub> Fw | 5'-TAGGAAGTTTAATGGACTTTTAGTAGATAATAGATAAATAG-3'           |
| OsNOMT <sub>250-26</sub> Rv | 5'-GTTTATATAGCTAGGATACCTAGCTTATTGG-3'                     |

Restriction sites are underlined.
